# Supplementary material for: Core Hunter: an algorithm for sampling genetic resources based on multiple genetic measures
Source: PubMed Central journal article supplement (PMC2734557; doi:10.1186/1471-2105-10-243), 2009-08-06
Supplement: 1471-2105-10-243-S1.pdf [file 1471-2105-10-243-S1.pdf]

# Supplemental Material

for  
Core Hunter: an algorithm for sampling genetic resources based on multiple genetic measures

**Table S1 - Expanded results for Table 1**

An expanded version of Table 1 is shown below. Values for all measures are shown for each genetic measure being optimized which is indicated in parenthesis. For instance, Core Hunter (MR) indicates 100% weight was allocated to the MR (Modified Rogers distance) measure. Values reported are the mean of 20 independent runs. Shaded cells indicate the value for Core Hunter was worse than either MSTRAT, D-Method, or both, according to the legend below. Values shown in bold are the best observed overall.

| Strategy            | MR           | CE           | SH           | HE           | NE           | PN           | CV             |
|---------------------|--------------|--------------|--------------|--------------|--------------|--------------|----------------|
| Bulk data set       |              |              |              |              |              |              |                |
| Core Hunter (MR)    | <b>0.572</b> | 0.637        | 4.427        | 0.639        | 3.073        | 0.091        | 90.900         |
| Core Hunter (CE)    | 0.569        | <b>0.641</b> | 4.452        | 0.646        | 3.145        | 0.065        | 93.500         |
| Core Hunter (SH)    | 0.481        | 0.578        | <b>4.531</b> | 0.664        | 3.376        | 0.027        | 97.300         |
| Core Hunter (HE)    | 0.499        | 0.589        | 4.520        | <b>0.667</b> | 3.370        | 0.034        | 96.600         |
| Core Hunter (NE)    | 0.478        | <b>0.576</b> | 4.509        | 0.660        | <b>3.446</b> | 0.022        | 97.800         |
| Core Hunter (PN/CV) | 0.441        | 0.524        | 4.401        | 0.619        | 2.950        | <b>0.000</b> | <b>100.000</b> |
| Core Hunter (multi) | 0.506        | 0.598        | 4.513        | 0.662        | 3.403        | 0.015        | 98.500         |
| Accession data set  |              |              |              |              |              |              |                |
| Core Hunter (MR)    | <b>0.694</b> | 0.747        | 4.571        | 0.640        | 3.078        | 0.148        | 85.200         |
| Core Hunter (CE)    | 0.688        | <b>0.752</b> | 4.623        | 0.660        | 3.248        | 0.115        | 88.500         |
| Core Hunter (SH)    | 0.662        | 0.738        | <b>4.670</b> | 0.669        | 3.349        | 0.060        | 94.000         |
| Core Hunter (HE)    | 0.662        | 0.738        | 4.649        | <b>0.676</b> | 3.353        | 0.116        | 88.400         |
| Core Hunter (NE)    | 0.654        | 0.730        | 4.622        | 0.655        | <b>3.501</b> | 0.102        | 89.800         |
| Core Hunter (PN/CV) | 0.637        | 0.706        | 4.517        | 0.605        | 2.836        | <b>0.000</b> | <b>100.000</b> |
| Core Hunter (multi) | 0.659        | 0.733        | 4.613        | 0.650        | 3.281        | 0.084        | 91.600         |
| Population data set |              |              |              |              |              |              |                |
| Core Hunter (MR)    | <b>0.442</b> | 0.534        | 4.379        | 0.574        | 2.744        | 0.335        | 66.500         |
| Core Hunter (CE)    | 0.433        | <b>0.540</b> | 4.420        | 0.591        | 2.754        | 0.306        | 69.400         |
| Core Hunter (SH)    | 0.374        | 0.501        | <b>4.503</b> | 0.610        | 2.916        | 0.191        | 80.900         |
| Core Hunter (HE)    | 0.419        | 0.524        | 4.478        | <b>0.619</b> | 2.861        | 0.254        | 74.600         |
| Core Hunter (NE)    | 0.394        | 0.507        | 4.472        | 0.604        | <b>2.997</b> | 0.249        | 75.100         |
| Core Hunter (PN/CV) | 0.360        | 0.467        | 4.451        | 0.592        | 2.776        | <b>0.177</b> | <b>82.300</b>  |
| Core Hunter (multi) | 0.396        | 0.508        | 4.482        | 0.609        | 2.969        | 0.225        | 77.500         |

\* Worse than MSTRAT   Worse than D-Method   Worse than both

**Table S2 - Expanded results for Table 2**

An expanded version of Table 2 is shown below. Values for all measures are shown for each genetic measure being optimized which is indicated in parenthesis. For instance, Core Hunter (MR) indicates 100% weight was allocated to the MR (Modified Rogers distance) measure. Values reported are the mean of 20 independent runs. Shaded cells indicate the value for Core Hunter was worse than Power Core. Values shown in bold are the best observed overall.

| Strategy            | MR           | CE           | SH           | HE           | NE           | PN           | CV             |
|---------------------|--------------|--------------|--------------|--------------|--------------|--------------|----------------|
| Core Hunter (MR)    | <b>0.926</b> | <b>0.926</b> | 5.158        | 0.857        | 8.111        | 0.124        | 87.600         |
| Core Hunter (CE)    | <b>0.926</b> | <b>0.926</b> | 5.158        | 0.857        | 8.111        | 0.124        | 87.600         |
| Core Hunter (SH)    | 0.814        | 0.814        | <b>5.259</b> | 0.870        | 9.061        | 0.081        | 91.900         |
| Core Hunter (HE)    | 0.777        | 0.777        | 5.231        | <b>0.873</b> | 8.958        | 0.144        | 85.600         |
| Core Hunter (NE)    | 0.814        | 0.814        | 5.224        | 0.867        | <b>9.431</b> | 0.108        | 89.200         |
| Core Hunter (PN)    | 0.865        | 0.865        | 5.065        | 0.816        | 6.851        | <b>0.000</b> | <b>100.000</b> |
| Core Hunter (multi) | 0.884        | 0.884        | 5.157        | 0.841        | 7.928        | <b>0.000</b> | <b>100.000</b> |

\* Worse than Power Core

**Table S3 - 10% Sampling Intensity**

The experiments which produced Table S1 were rerun for Core Hunter with a core subset sampling intensity of 10%. Values which are worse than those found with a 20% sampling intensity have been highlighted.

| Strategy            | MR    | CE    | SH    | HE    | NE    | PN    | CV      |
|---------------------|-------|-------|-------|-------|-------|-------|---------|
| Bulk data set       |       |       |       |       |       |       |         |
| Core Hunter (MR)    | 0.611 | 0.666 | 4.404 | 0.636 | 3.011 | 0.167 | 83.300  |
| Core Hunter (CE)    | 0.603 | 0.670 | 4.436 | 0.643 | 3.141 | 0.129 | 87.100  |
| Core Hunter (SH)    | 0.484 | 0.589 | 4.559 | 0.671 | 3.467 | 0.032 | 96.800  |
| Core Hunter (HE)    | 0.516 | 0.610 | 4.541 | 0.678 | 3.478 | 0.086 | 91.400  |
| Core Hunter (NE)    | 0.479 | 0.583 | 4.534 | 0.669 | 3.593 | 0.065 | 93.500  |
| Core Hunter (PN)    | 0.438 | 0.528 | 4.419 | 0.621 | 2.987 | 0.000 | 100.000 |
| Accession data set  |       |       |       |       |       |       |         |
| Core Hunter (MR)    | 0.709 | 0.761 | 4.584 | 0.653 | 3.182 | 0.228 | 77.200  |
| Core Hunter (CE)    | 0.701 | 0.767 | 4.649 | 0.674 | 3.397 | 0.166 | 83.400  |
| Core Hunter (SH)    | 0.677 | 0.752 | 4.708 | 0.682 | 3.467 | 0.106 | 89.400  |
| Core Hunter (HE)    | 0.663 | 0.741 | 4.675 | 0.693 | 3.535 | 0.190 | 81.000  |
| Core Hunter (NE)    | 0.663 | 0.734 | 4.629 | 0.663 | 3.720 | 0.191 | 80.900  |
| Core Hunter (PN)    | 0.643 | 0.719 | 4.576 | 0.619 | 2.961 | 0.000 | 100.000 |
| Population data set |       |       |       |       |       |       |         |
| Core Hunter (MR)    | 0.502 | 0.585 | 4.258 | 0.546 | 2.438 | 0.512 | 48.800  |
| Core Hunter (CE)    | 0.502 | 0.585 | 4.258 | 0.546 | 2.438 | 0.512 | 48.800  |
| Core Hunter (SH)    | 0.378 | 0.532 | 4.420 | 0.594 | 2.844 | 0.368 | 63.200  |
| Core Hunter (HE)    | 0.378 | 0.532 | 4.420 | 0.594 | 2.844 | 0.368 | 63.200  |
| Core Hunter (NE)    | 0.390 | 0.534 | 4.404 | 0.590 | 2.850 | 0.383 | 61.700  |
| Core Hunter (PN)    | 0.339 | 0.448 | 4.364 | 0.572 | 2.593 | 0.349 | 65.100  |

\* Worse than Core Hunter (20% sampling intensity)

### Table S4 - 30% Sampling Intensity

The experiments which produced Table S1 were rerun for Core Hunter with a core subset sampling intensity of 30%. Values which are worse than those found with a 20% sampling intensity have been highlighted.

| Strategy                                          | MR    | CE    | SH    | HE    | NE    | PN    | CV      |
|---------------------------------------------------|-------|-------|-------|-------|-------|-------|---------|
| Bulk data set                                     |       |       |       |       |       |       |         |
| Core Hunter (MR)                                  | 0.546 | 0.615 | 4.427 | 0.637 | 3.035 | 0.042 | 95.800  |
| Core Hunter (CE)                                  | 0.543 | 0.618 | 4.448 | 0.642 | 3.114 | 0.037 | 96.300  |
| Core Hunter (SH)                                  | 0.475 | 0.569 | 4.511 | 0.657 | 3.307 | 0.016 | 98.400  |
| Core Hunter (HE)                                  | 0.481 | 0.571 | 4.502 | 0.659 | 3.302 | 0.028 | 97.200  |
| Core Hunter (NE)                                  | 0.472 | 0.567 | 4.496 | 0.654 | 3.361 | 0.016 | 98.400  |
| Core Hunter (PN)                                  | 0.442 | 0.523 | 4.398 | 0.619 | 2.927 | 0.000 | 100.000 |
| Accession data set                                |       |       |       |       |       |       |         |
| Core Hunter (MR)                                  | 0.683 | 0.737 | 4.554 | 0.631 | 3.010 | 0.103 | 89.700  |
| Core Hunter (CE)                                  | 0.677 | 0.742 | 4.596 | 0.648 | 3.146 | 0.087 | 91.300  |
| Core Hunter (SH)                                  | 0.655 | 0.731 | 4.636 | 0.656 | 3.236 | 0.037 | 96.300  |
| Core Hunter (HE)                                  | 0.656 | 0.731 | 4.616 | 0.663 | 3.217 | 0.081 | 91.900  |
| Core Hunter (NE)                                  | 0.653 | 0.726 | 4.599 | 0.645 | 3.356 | 0.074 | 92.600  |
| Core Hunter (PN)                                  | 0.635 | 0.702 | 4.494 | 0.599 | 2.782 | 0.000 | 100.000 |
| Population data set                               |       |       |       |       |       |       |         |
| Core Hunter (MR)                                  | 0.430 | 0.522 | 4.412 | 0.582 | 2.745 | 0.263 | 73.700  |
| Core Hunter (CE)                                  | 0.422 | 0.525 | 4.446 | 0.593 | 2.829 | 0.215 | 78.500  |
| Core Hunter (SH)                                  | 0.372 | 0.484 | 4.504 | 0.614 | 2.887 | 0.144 | 85.600  |
| Core Hunter (HE)                                  | 0.389 | 0.493 | 4.494 | 0.619 | 2.856 | 0.182 | 81.800  |
| Core Hunter (NE)                                  | 0.381 | 0.493 | 4.497 | 0.608 | 2.965 | 0.158 | 84.200  |
| Core Hunter (PN)                                  | 0.355 | 0.466 | 4.474 | 0.598 | 2.760 | 0.124 | 87.600  |
| * Worse than Core Hunter (20% sampling intensity) |       |       |       |       |       |       |         |
